1 **YHP: Y-chromosome Haplogroup Predictor for predicting male lineages based on Y-STRs**

2

3 Mengyuan Song<sup>1¶</sup>, Feng Song<sup>1¶</sup>, Chenxi Zhao<sup>2¶</sup>, Yiping Hou<sup>1\*</sup>

4 <sup>1</sup>Institute of Forensic Medicine, West China School of Basic Science & Forensic

5 Medicine, Sichuan University, Chengdu, China

6 <sup>2</sup>College of Computer Science, Sichuan University, Chengdu, China

7

8 **\*Corresponding author:**

9 E-mail: [forensic@scu.edu.cn](mailto:forensic@scu.edu.cn)

10

11 <sup>¶</sup>These authors contributed equally to this work.

12

## 13 **Abstract**

14 Human Y chromosome reflects the evolutionary process of males. Male lineage tracing by Y  
15 chromosome is of great use in evolutionary, forensic, and anthropological studies when male  
16 samples exist or especially when the biological sample is a mixture of male and female  
17 individuals. Identifying the male lineage based on the specific distribution of Y haplogroups  
18 narrows down the investigation scope. Integrating previously published datasets with genotypes  
19 of Y chromosome short tandem repeats (Y-STRs) and high-resolution haplogroups (122  
20 haplogroups in total), we developed YHP (Y Haplogroup Predictor), an open-access and user-  
21 friendly software package to predict haplogroups, compare the similarity, and conduct  
22 mismatch analysis of samples with Y-STR profiles. The software is available at Github  
23 (<https://github.com/cissy123/YHP-Y-Haplogroup-Predictor->).

24

25 **Key words:** human Y chromosome; haplogroup; male lineage prediction; random forest

26

## 27 **Author Summary**

28 Familial searching has been used in forensic, anthropologic, and personalized scenarios.  
29 Software packages have been developed to assist in male familial searching, such as predicting  
30 Y-SNP haplogroups by Y-STRs. However, these software packages, in general, achieve this  
31 goal with a rough resolution. In this study, we developed a software package to conduct high-  
32 resolution haplogroup inference to help familial searching and at the same time reduce the cost,  
33 since it does not require tiresome Y-SNP sequencing.

34

## 35 **Introduction**

36 Human Y chromosome has its unique evolutionary pattern and thus male phylogeny can be  
37 used to trace male lineages, which is promising in evolutionary, forensic and anthropologic  
38 studies. In forensics, identifying the possible genealogy of a DNA profile in crime scene  
39 investigations based on searching from the DNA database is of great interest (1,2). Previously  
40 findings of autosomal chromosomes indicate that some forensically useful marker sets might  
41 bear substantial ancestry information (3), indicating a significant connection between genes and  
42 geography (4). Besides, potential matches for two kinds of distinct genetic markers were  
43 reported, such as Combined DNA Index System (CODIS) profile and single nucleotide  
44 polymorphism (SNP) data, making it possible to link a CODIS profile to a whole-genome SNP  
45 profile (5–7). For Y chromosomes, the correlation of surnames and male-specific region  
46 markers in Y chromosome is vital (8,9). Since surnames are arranged by male lineage in general,  
47 we wondered if there was a correlation between two kinds of Y-chromosome markers, Y-STRs  
48 and Y-SNPs (markers defining Y haplogroups), especially in haplogroup O.

49

50 Due to the low cost-effectiveness to genotype plenty of SNPs to assign haplogroups to  
51 individuals, and the link between Y-STR variability and haplogroups (10), many software or  
52 programs appeared (**Table 1**). The software named "Yleaf" was established for Y haplogroup  
53 inference from next-generation sequencing data (11), as well as many other packages for Y-  
54 STR data (12). Similarly, algorithms have been raised to classify mtDNA haplogroups (13).  
55 Previously, machine learning methods have been largely used in biological studies. Random  
56 forest has been previously used in reconstructing invasion routes of *Drosophila suzukii* using a  
57 multi-locus microsatellite dataset containing 25 loci of 23 population sites (14). Support Vector  
58 Machine (SVM) was used to inference the biogeographic ancestry based on STR profiles (15).

59 Deep neural networks were also applied in predicting geographic location using whole-genome  
60 sequence data of the organisms, achieving median test errors of 16.9km, 5.7km and 85km for  
61 three species (*Plasmodium* parasites, *Anopheles* mosquitoes, and global human populations)  
62 (16). More specifically, artificial neural networks were also used in classifying electrophoresis  
63 profiles in forensic casework (17,18). Here in this study, we used machine learning to predict  
64 Y haplogroups to a fine resolution based on Y-STRs.

65

66 **Table 1.** Summary of previous softwares.

| Softwares                                       | Establishers (References)                                                 | (References)                | Principles                                                                                                                                                            | Websites available                                                                                                                  |
|-------------------------------------------------|---------------------------------------------------------------------------|-----------------------------|-----------------------------------------------------------------------------------------------------------------------------------------------------------------------|-------------------------------------------------------------------------------------------------------------------------------------|
| <b>Haplogroup prediction software</b>           |                                                                           |                             |                                                                                                                                                                       |                                                                                                                                     |
| 1 YPredictor                                    | Vadim Urasin (YFull-Research Group, Moscow, Russia.)                      |                             | Based on the phylogeny of each haplogroup, genotype of markers, mutation rates and the age of the parental node                                                       | <a href="http://predictor.ydna.ru/">http://predictor.ydna.ru/</a><br>(cannot be accessed)                                           |
| 2 Haplogroup Predictor                          | Whit (Brookeville, USA) (19,20)                                           | Atheys MD,                  | Fitness score and Bayesian probability calculations                                                                                                                   | <a href="http://www.hprg.com/happest5/">http://www.hprg.com/happest5/</a>                                                           |
| 3 Haplogroup classifier                         | Joseph (Computer Department, University of Arizona, Tucson, Arizona) (12) | Schlecht Science University | Machine learning approaches (decision tree, J48 and PART; Bayesian; support vector machine)                                                                           | <a href="http://bcf.arl.arizona.edu/haplo">http://bcf.arl.arizona.edu/haplo</a><br>(cannot be accessed)                             |
| 4 World Haplogroup & Haplo-I Subclade Predictor | Jim Cullen                                                                |                             | works on a Bootstrap WGD ( weighted genetic distance ) algorithm that's a variation of a goodness-of-fit test                                                         | <a href="http://members.bex.net/jtcullen515/haplotest.htm">members.bex.net/jtcullen515/haplotest.htm</a>                            |
| 5 NevGen Y-DNA haplogroup predictor             | Nevgen (Concept & JavaScript coding. Ken Nordtvedt)                       |                             | Predict haplogroup R1b and R1a based on the correlation of the Y-STRs and Bayesian-allele-frequency                                                                   | <a href="http://www.nevgen.org">www.nevgen.org</a>                                                                                  |
| 6 R-L21 SNP Predictor                           | Robert Casey                                                              |                             | Use binary Logistic Regression as the mathematical model representing the relationship between Y-STRs and Y-SNPs                                                      | <a href="http://www.rcasey.net/DNA/R_L21/SNP_Predictor/index.php">http://www.rcasey.net/DNA/R_L21/SNP_Predictor/index.php</a>       |
| <b>Haplogroup assignment software</b>           |                                                                           |                             |                                                                                                                                                                       |                                                                                                                                     |
| 7 AMY-tree                                      | (21)                                                                      |                             | Determine Y haplogroups of samples based on whole genome SNP profiles (at least 10x coverage)                                                                         | <a href="http://bio.kuleuven.be/eeb/lbeg">bio.kuleuven.be/eeb/lbeg</a>                                                              |
| 8 YHap                                          | (22)                                                                      |                             | Borrow information among individuals within a population by using a probabilistic assignment model to assign haplogroup for low-coverage data (less than 2x coverage) | <a href="http://www1.imperial.ac.uk/medicine/people/l.coin/">http://www1.imperial.ac.uk/medicine/people/l.coin/</a>                 |
| 9 YFitter                                       | (23)                                                                      |                             | Use an efficient dynamic programming algorithm that can assign haplogroups by maximum likelihood and represent the uncertainty in assignment                          | <a href="http://sourceforge.net/projects/yfitter/">http://sourceforge.net/projects/yfitter/</a>                                     |
| 10 Yleaf                                        | (11)                                                                      |                             | Works with raw and aligned sequencing data to produce the final haplogroup output files                                                                               | <a href="https://www.erasmusmc.nl/genetic_identification/resources/">https://www.erasmusmc.nl/genetic_identification/resources/</a> |

68 **Results and Discussion**

69 Here we present YHP (Y Haplogroup Predictor), based on machine learning algorithms, written  
70 in Java, a user-friendly public software package to predict Y haplogroups based on Y-STRs.  
71 The prediction accuracy was shown in **FIG. 1A**. Haplogroup information of database samples  
72 used to train the algorithms was illustrated in **FIG. 1B** (detailed haplogroup information is in  
73 **Supplementary table 1**). The three functions of YHP are shown in **FIG. 1C**.

74

75 **Fig 1.**

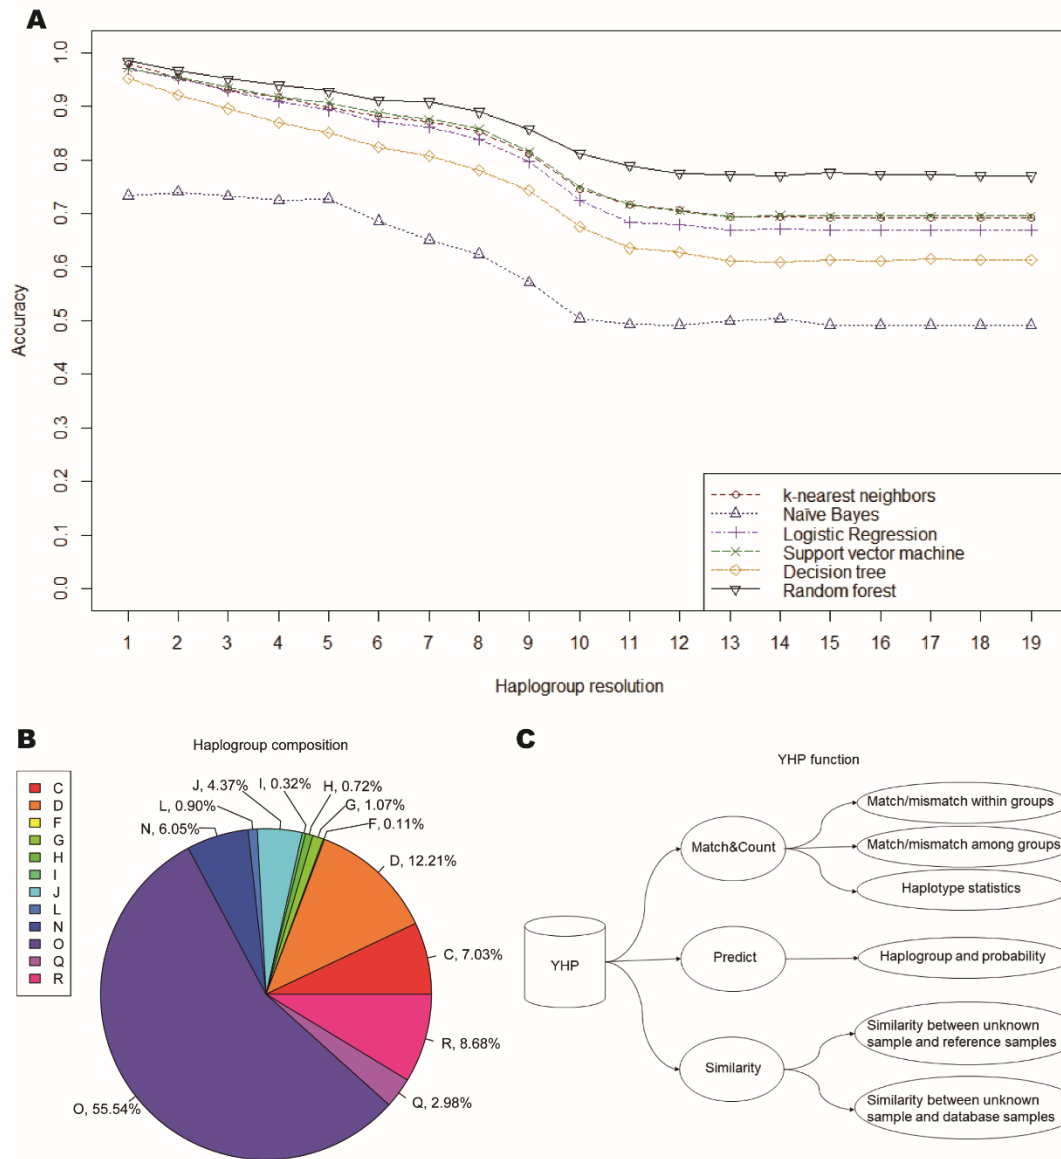

76

77

78 Of the six algorithms, random forest achieved the highest accuracy (both in the terminal and  
79 basal haplogroup: 0.770 and 0.984, respectively). Prediction accuracy was defined by the  
80 number of samples correctly predicted dividing the total sample size of the training datasets and  
81 was shown in **Table 2**. Except for haplogroup prediction, we conducted population and region  
82 prediction. However, the accuracy is lower when predicting for population and region (**Table**  
83 **2**). More specifically, the accuracy for each haplogroup in random forest was displayed in **FIG.**  
84 **2**.

85



86 **Table 2.** Prediction accuracy of the six acquired models while predicting the sample to  
87 haplogroup, population or region.

| Methods                 | Accuracy for haplogroup | population | region |
|-------------------------|-------------------------|------------|--------|
| k-nearest neighbors     | 0.691                   | 0.671      | 0.235  |
| Naïve Bayes*            | 0.735                   | 0.568      | 0.121  |
| Logistic Regression*    | 0.736                   | 0.627      | 0.136  |
| Support vector machine* | 0.738                   | 0.721      | 0.209  |
| Decision tree*          | 0.659                   | 0.623      | 0.189  |
| Random forest           | 0.770                   | 0.752      | 0.255  |

88 \*The methods are optimized by linear discriminant analysis (LDA).

89

90 **Fig 2.**

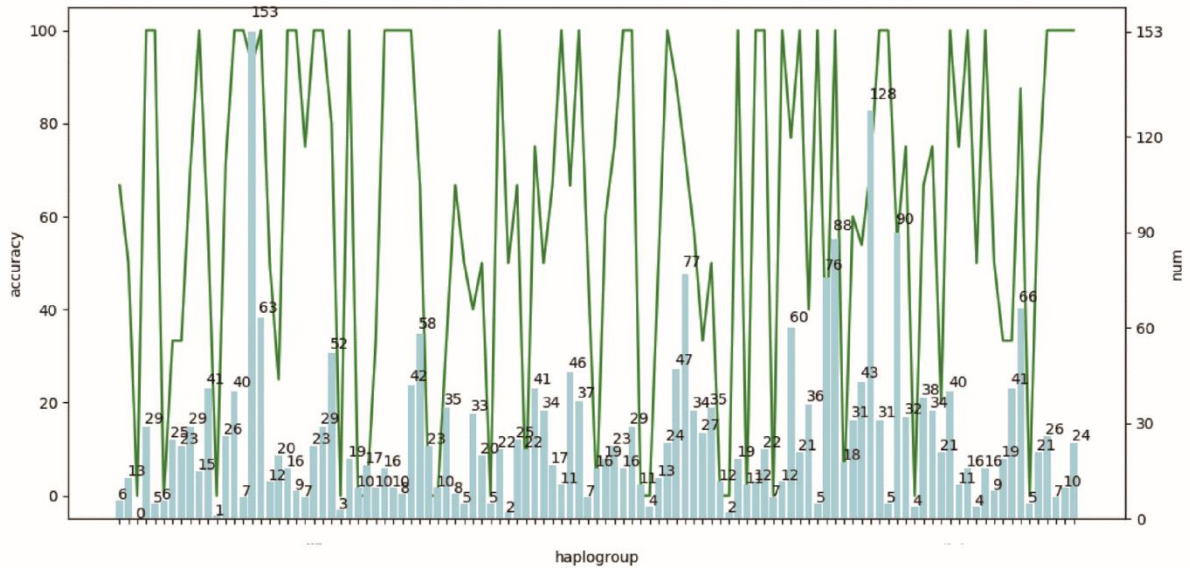

91

92

93 The use of YHP was previously validated in a real case (24), population samples (25), and  
94 another case (seen in **Supplementary figure 1-3 and Supplementary table 2-4,**  
95 **Supplementary Material I**), all of them with validated Y-STR and Y-SNP genotypes. This was  
96 achieved by the first and second function, “Predict” and “Similarity”.

97

98 The third function, “Match&Count” serves when there is an unknown sample (e.g., from the  
99 real crime scenes or anthropological sites) and reference samples (e.g., Y-STR profiles from the  
100 database, without Y haplogroup information), and we need to find the closest male lineage to  
101 the unknown sample to conduct familial searching (fig. 1C, YHP function; the detailed function  
102 description of YHP input files, pipeline, and output files are in **Supplementary figure 4-18,**  
103 **Supplementary Material II, III, and IV**). This software is also convenient for mismatch  
104 analysis within or among haplogroups and populations. The function was previously applied in  
105 a paper describing the founder effect of Li ethnic group (26), and was instructive in familiar  
106 searching. We conducted 5,966,785 times mismatch (n=3455) calculations in the software and  
107 the results were shown in Supplementary table 3 and 4. The results shows, when mismatch  
108 number is no more than two, the frequency of the sample pair belonging to the same haplogroup  
109 exceeds 97% (mismatch number=0, 100%; mismatch number=1, 99.28%; mismatch number=2,  
110 97.16%); when mismatch step is no more than two, the frequency of the sample pair belonging  
111 to the same haplogroup exceeds 97% (mismatch number=0, 100%; mismatch number=1,  
112 99.08%; mismatch number=2, 97.22%) (**Supplementary table 5 and 6**).

113

114 Previous relevant software or programs aim at predicting samples to haplogroup I, R, J or very  
115 basal haplogroups (seen in Figure 1 of (12)), or assign haplogroup based on high-coverage or  
116 low-coverage whole-genome sequencing or resequencing data (**Table 1**). For instance,

117 inconsistency was reported in haplogroup prediction of a father-son pair using Whit Athey's  
118 haplogroup predictor (<http://www.hprg.com/hapest5/hapest5b/hapest5.htm>) (20,27). However,  
119 after Y-SNP testing, the father-son pair was validated in the same haplogroup O1a1a. This  
120 indicated that more accurate prediction is needed. The software YHP can effectively predict the  
121 father-son pair into haplogroup O1a1a2a1. YHP mainly focuses on haplogroup O (1919/3455,  
122 55.54%, fig. 1B) (26,28,29) to give a high-resolution prediction result, where no previous  
123 software reached this resolution. We have extended the resolution to 122 terminal clades, and  
124 hopefully, in the future, the software can perform prediction more specifically without  
125 sacrificing too much accuracy.

126

127 Since it requires haplotypes with known haplogroups to obtain well-established models, a larger  
128 dataset needs to be generated to achieve higher accuracy. Admittedly, the prediction accuracy  
129 is not under satisfaction in the finest resolution (although in basal haplogroup prediction, the  
130 accuracy reaches 98.4%). However, the unprecedented high resolution of haplogroup makes  
131 the software valuable in differentiating close male lineages, thus narrowing down the  
132 investigative scope in forensic and anthropological events.

133

134 Although there might be a plethora of samples that only have a few Y-STR mismatches when  
135 searching the database, pinpointing samples that are probable to be the same haplogroup is  
136 largely restricted. STRs are appealing genetic materials about both population history and  
137 evolutionary process, but they are difficult to interpret due to the back mutations (30,31).  
138 Considering the low mutation rate of Y-SNPs, individuals with the same prediction results tend  
139 to be from the same male lineage. This is of tremendous use for familial searching to speed up  
140 the process of finding the perpetrator.

## 141 **Design and Implementation**

### 142 **Datasets**

143 Here we use 3455 samples with 27 Y-STRs and 137 Y-SNPs in the dataset (the haplogroup  
144 information is listed in **Supplementary table 1**), generated by capillary electrophoresis  
145 (Genetic Analyzer 3130 and 3500) and next-generation sequencing (Ion Torrent PGM) and  
146 pyrosequencing (26,28,29). The study received the approval of the Ethics Committee at the  
147 Institute of Forensic Medicine, Sichuan University (K2019018) and the data were analyzed  
148 anonymously due to privacy concerns.

149

### 150 **Algorithms**

151 Supervised learning algorithms, k-nearest neighbors, Naïve Bayes, Logistic Regression,  
152 Support vector machine, Decision tree, and Random forest were used to train a model  
153 respectively. The acquired model was used to predict the test datasets. When training a model,  
154 we randomly split the data into training and test datasets to get a good representation of all data  
155 points. We split 3455 people into two disjoint subsets: a training set for learning associations  
156 between Y-STRs and Y-SNPs and a test set for assessing prediction accuracy (400 samples as  
157 test dataset and the remaining as training dataset; the training process was finished using 10  
158 iterations). We use five-fold cross-validation with the same fraction of the full data (12%). The  
159 input and output variables are indicated as X and Y, respectively, while the value for these two  
160 variables is indicated by x and y. The input data x is indicated as:

$$161 \quad x = (x^{(1)}, x^{(2)}, \dots, x^{(i)}, \dots, x^{(m)})^T$$

162  $x^{(i)}$  is the  $i$ th locus of a single haplotype with  $m$  Y-STRs ( $m=27$  in this study). The output data  
163  $y_i$  is the haplogroup of the corresponding  $x_i$ . The training data TR consists of pairs of input

164 and output values, shown as:

$$165 \quad TR = \{(x_1, y_1), (x_2, y_2), \dots, (x_j, y_j), \dots, (x_n, y_n)\}$$

166  $y_j$  is the haplogroup of sample  $j$ , with  $n$  being the total sample number ( $n=3455$  in this study).

167

168 Supervised learning assumes that input and output variables  $X$  and  $Y$  are subject to the  
169 probability distribution  $P(X, Y)$ , which is a probability density function. In the learning process,  
170 learning system uses the specified training dataset to learn and get a model, which is indicated  
171 as conditional probability distribution  $P(Y|X)$  or statistical decision function. In the predicting  
172 process, predicting system will give an output  $y_{N+1}$  based on the input  $x_{N+1}$  and the model:

$$173 \quad y_{N+1} = \arg \max P(y_{N+1}|x_{N+1}) \text{ or } y_{N+1} = f(x_{N+1})$$

174 If the model has a high capability of prediction, the difference between the training data  $y_i$  and  
175 the data  $f(x_i)$  obtained from the model should be subtle enough (that means the sample is  
176 predicted to the closest haplogroup). The learning system will select the best model among all  
177 learning process to give the best prediction for the training dataset and unknown datasets.

178

179 Next, to give a rank to the reference samples evaluating the closest sample to the unknown  
180 sample, we developed similarity score using cosine distance, which is indicated as follows:

$$181 \quad \text{similarity} = \text{cosine\_distance}(\text{probability\_unknown}, \text{probability\_reference})$$

182

### 183 **Availability and future directions**

184 The example data, and the code are available at Github ([https://github.com/cissy123/YHP-Y-](https://github.com/cissy123/YHP-Y-Haplogroup-Predictor-)  
185 [Haplogroup-Predictor-](https://github.com/cissy123/YHP-Y-Haplogroup-Predictor-)). The software YHP works under Java environment, the package of

186 which can be downloaded from the link written in the readme file of the website.

187 Future directions include developing a Linux-based version and optimizing the algorithms for  
188 prediction.

189

## 190 **Supporting information**

191 S1-6 Table and S1-18 Figure are compiled in the Supplementary material file (PDF).

192

## 193 **Author Contributions**

194 Conceptualization: Mengyuan Song, Yiping Hou.

195 Data curation: Feng Song, Chenxi Zhao.

196 Funding acquisition: Feng Song, Yiping Hou.

197 Methodology: Mengyuan Song, Chenxi Zhao.

198 Software: Mengyuan Song, Chenxi Zhao.

199 Supervision: Feng Song, Yiping Hou.

200 Writing-original draft: Mengyuan Song.

201 Writing-review & editing: Mengyuan Song, Feng Song, Chenxi Zhao, Yiping Hou.

202

## 203 **Data Availability Statement:**

204 All relevant data are within the manuscript and its Supporting Information files.

205

206 **Funding:**

207 This work was supported by National Natural Science Foundation of China (grant numbers  
208 81871532 and 81701866).

209

210 **Competing interests:**

211 The authors have declared that no competing interests exist

212

213 **References**

- 214 1. Cheung EYY, Gahan ME, McNevin D. Prediction of biogeographical ancestry in  
215 admixed individuals. *Forensic Sci Int Genet.* 2018;
- 216 2. Hammer MF, Chamberlain VF, Kearney VF, Stover D, Zhang G, Karafet T, et al.  
217 Population structure of Y chromosome SNP haplogroups in the United States and  
218 forensic implications for constructing Y chromosome STR databases. *Forensic Sci Int.*  
219 2006;164(1):45–55.
- 220 3. Algee-Hewitt BFB, Edge MD, Kim J, Li JZ, Rosenberg NA. Individual Identifiability  
221 Predicts Population Identifiability in Forensic Microsatellite Markers. *Curr Biol.*  
222 2016;26(7):935–42.
- 223 4. Wang C, Zöllner S, Rosenberg NA. A Quantitative Comparison of the Similarity  
224 between Genes and Geography in Worldwide Human Populations. *PLoS Genet.* 2012;
- 225 5. Payseur BA, Place M, Weber JL. Linkage disequilibrium between STRPs and SNPs  
226 across the human genome. *Am J Hum Genet [Internet].* 2008 May [cited 2019 Dec  
227 16];82(5):1039–50. Available from: <http://www.ncbi.nlm.nih.gov/pubmed/18423524>



- 228 6. Edge MD, Algee-Hewitt BFB, Pemberton TJ, Li JZ, Rosenberg NA. Linkage  
229 disequilibrium matches forensic genetic records to disjoint genomic marker sets. *Proc*  
230 *Natl Acad Sci* [Internet]. 2017 May 30 [cited 2019 Dec 16];114(22):5671–6. Available  
231 from: <https://www.pnas.org/content/114/22/5671>
- 232 7. Kim J, Edge MD, Algee-Hewitt BFB, Li JZ, Rosenberg NA. Statistical Detection of  
233 Relatives Typed with Disjoint Forensic and Biomedical Loci. *Cell*. 2018;
- 234 8. Gymrek M, McGuire AL, Golan D, Halperin E, Erlich Y. Identifying personal  
235 genomes by surname inference. *Science* (80- ). 2013;339(6117):321–4.
- 236 9. Claerhout S, Roelens J, Van der Haegen M, Verstraete P, Larmuseau MHD, Decorte R.  
237 Ysurnames? The patrilineal Y-chromosome and surname correlation for DNA kinship  
238 research. *Forensic Sci Int Genet*. 2020;44(July 2019).
- 239 10. Bosch E, Calafell F, Santos FR, Pérez-Lezaun A, Comas D, Benchemsi N, et al.  
240 Variation in short tandem repeats is deeply structured by genetic background on the  
241 human Y chromosome. *Am J Hum Genet*. 1999;
- 242 11. Ralf A, Montiel González D, Zhong K, Kayser M. Yleaf: Software for Human Y-  
243 Chromosomal Haplogroup Inference from Next-Generation Sequencing Data. *Mol Biol*  
244 *Evol*. 2018;
- 245 12. Schlecht J, Kaplan ME, Barnard K, Karafet T, Hammer MF, Merchant NC. Machine-  
246 learning approaches for classifying haplogroup from Y chromosome STR data. *PLoS*  
247 *Comput Biol*. 2008;
- 248 13. Wong C, Li Y, Lee C, Huang CH. Ensemble learning algorithms for classification of  
249 mtDNA into haplogroups. *Brief Bioinform*. 2011;12(1):1–9.
- 250 14. Fraimout A, Debat V, Fellous S, Hufbauer RA, Foucaud J, Pudlo P, et al. Deciphering

- 251 the routes of invasion of *Drosophila suzukii* by Means of ABC Random Forest. *Mol*  
252 *Biol Evol.* 2017;
- 253 15. Alladio E, Della Rocca C, Barni F, Dugoujon JM, Garofano P, Semino O, et al. A  
254 multivariate statistical approach for the estimation of the ethnic origin of unknown  
255 genetic profiles in forensic genetics. *Forensic Sci Int Genet* [Internet].  
256 2020;45(November 2019):102209. Available from:  
257 <https://doi.org/10.1016/j.fsigen.2019.102209>
- 258 16. Battey CJ, Ralph PL, Kern AD. Predicting Geographic Location from Genetic  
259 Variation with Deep Neural Networks. *bioRxiv.* 2019;
- 260 17. Taylor D, Kitselaar M, Powers D. The generalisability of artificial neural networks  
261 used to classify electrophoretic data produced under different conditions. *Forensic Sci*  
262 *Int Genet.* 2019;38:181–4.
- 263 18. Taylor D, Powers D. Forensic Science International : Genetics Teaching arti fi cial  
264 intelligence to read electropherograms. 2016;25:10–8.
- 265 19. Athey TW. Haplogroup prediction from Y-STR values using an allele-frequency  
266 approach. *J Genet Geneal* [Internet]. 2005;1:1–7. Available from:  
267 <http://volgagermanbrit.us/documents/athey.pdf>
- 268 20. Athey TW. Haplogroup Prediction from Y-STR Values Using a Bayesian-Allele-  
269 Frequency Approach. *J Genet Geneal.* 2006;
- 270 21. Van Geystelen A, Decorte R, Larmuseau MHD. AMY-tree: An algorithm to use whole  
271 genome SNP calling for Y chromosomal phylogenetic applications. *BMC Genomics.*  
272 2013;
- 273 22. Zhang F, Chen R, Liu D, Yao X, Li G, Jin Y, et al. YHap: A population model for

- 274 probabilistic assignment of Y haplogroups from re-sequencing data. BMC  
275 Bioinformatics. 2013;14(1).
- 276 23. Jostins L, Xu Y, McCarthy S, Ayub Q, Durbin R, Barrett J, et al. YFitter: Maximum  
277 likelihood assignment of Y chromosome haplogroups from low-coverage sequence  
278 data. 2014;1–6. Available from: <http://arxiv.org/abs/1407.7988>
- 279 24. Song M, Zhao C, Wang Z, Hou Y. Applying machine learning algorithms to a real  
280 forensic case to predict Y-SNP haplogroup based on Y-STR haplotype. Forensic Sci  
281 Int Genet Suppl Ser. 2019;
- 282 25. Song M, Song F, Wang S, Hou Y. Developmental validation of the Yfiler™ Platinum  
283 PCR Amplification Kit for forensic genetic caseworks and databases. Electrophoresis.  
284 2020;
- 285 26. Song M, Wang Z, Zhang Y, Zhao C, Lang M, Xie M, et al. Forensic characteristics and  
286 phylogenetic analysis of both Y-STR and Y-SNP in the Li and Han ethnic groups from  
287 Hainan Island of China. Forensic Sci Int Genet. 2019;39:e14–20.
- 288 27. Zhang Z, Gao T, Li J, Lang M, Yun L. The finding of disaccord in haplogroup  
289 prediction by online software in a father-son pair. Forensic Sci Int Genet Suppl Ser  
290 [Internet]. 2017;6(August):e175–6. Available from:  
291 <http://dx.doi.org/10.1016/j.fsigss.2017.09.062>
- 292 28. Lang M, Liu H, Song F, Qiao X, Ye Y, Ren H, et al. Forensic characteristics and  
293 genetic analysis of both 27 Y-STRs and 143 Y-SNPs in Eastern Han Chinese  
294 population. Forensic Sci Int Genet. 2019;42(July):e13–20.
- 295 29. Xie M, Song F, Li J, Lang M, Luo H, Wang Z, et al. Genetic substructure and forensic  
296 characteristics of Chinese Hui populations using 157 Y-SNPs and 27 Y-STRs. Forensic

297           Sci Int Genet. 2019;

298   30.   Putman AI, Carbone I. Challenges in analysis and interpretation of microsatellite data  
299           for population genetic studies. *Ecol Evol.* 2014;4(22):4399–428.

300   31.   Wilson IJ, Balding DJ. Genealogical inference from microsatellite data. *Genetics.*  
301           1998;

302

303

304 **Figure legends**

305 **Fig 1.** (A) Prediction accuracy of different models under different haplogroup resolution  
306 (number 1-19 means the length of the haplogroup name). (B) Haplogroup composition of the  
307 database. (C) Three main functions of YHP and the expected results.

308 **Fig 2.** Prediction accuracy for each haplogroup in random forest. The number in each bar  
309 indicates the sample size in each haplogroup. The haplogroup information in x-axis can be  
310 obtained upon request.

311

|     |                                                                                      |
|-----|--------------------------------------------------------------------------------------|
| 312 | <b>YHP: a software for predicting Y haplogroups based on Y-STRs</b>                  |
| 313 | <b>Supplementary material</b>                                                        |
| 314 |                                                                                      |
| 315 |                                                                                      |
| 316 |                                                                                      |
| 317 |                                                                                      |
| 318 |                                                                                      |
| 319 | <b>Supplementary table 1.....2</b>                                                   |
| 320 | <b>Supplementary Material I (Supplementary figure 1-3 and Supplementary table 2-</b> |
| 321 | <b>4) .....4</b>                                                                     |
| 322 | <b>Supplementary Material II (Supplementary figure 4-6) .....9</b>                   |
| 323 | <b>Supplementary Material III (Supplementary figure 7-13) .....11</b>                |
| 324 | <b>Supplementary Material IV (Supplementary figure 14-18) .....17</b>                |
| 325 | <b>Supplementary table 5.....21</b>                                                  |
| 326 | <b>Supplementary table 6.....22</b>                                                  |
| 327 |                                                                                      |

328 **Supplementary table 1.** Haplogroup information of the samples and their corresponding size  
 329 in each haplogroup.

| haplogroup | number of haplotypes | haplogroup     | number of haplotypes | haplogroup       | number of haplotypes |
|------------|----------------------|----------------|----------------------|------------------|----------------------|
| C          | 9                    | N1a1a          | 17                   | O2a1c1a1a1b      | 20                   |
| C2         | 15                   | N1a1a1a1a3     | 10                   | O2a1c1a1b        | 1                    |
| C2b        | 7                    | N1a1a1a1a4     | 9                    | O2a1c1a1c        | 12                   |
| C2b1a1b1   | 3                    | N1a2           | 39                   | O2a1c1a1d        | 13                   |
| C2b1a2     | 6                    | N1b            | 67                   | O2a1c1a1e        | 27                   |
| C2b1a3     | 29                   | N1~            | 24                   | O2a2             | 8                    |
| C2b1b      | 6                    | O1a            | 10                   | O2a2a            | 13                   |
| C2c1       | 8                    | O1a1a          | 15                   | O2a2a1           | 73                   |
| C2c1a1     | 23                   | O1a1a1a        | 5                    | O2a2a1a1a        | 23                   |
| C2c1a1a1   | 26                   | O1a1a1a1       | 36                   | O2a2b            | 42                   |
| C2c1a2     | 38                   | O1a1a1a1a      | 14                   | O2a2b1           | 1                    |
| C2c1a2b    | 16                   | O1a1a1a1a1a    | 7                    | O2a2b1a1         | 6                    |
| C2c1b      | 41                   | O1a1a1a1a1a1   | 38                   | O2a2b1a1a        | 84                   |
| D1a1       | 6                    | O1a1a1a1a1a1a  | 24                   | O2a2b1a1a1       | 93                   |
| D1a1a1a    | 3                    | O1a1a1a1a1a1b  | 2                    | O2a2b1a1a3       | 23                   |
| D1a1a1a1   | 2                    | O1a1a1a1a1a1b1 | 8                    | O2a2b1a1a4       | 35                   |
| D1a1a1a1a  | 31                   | O1a1a1b        | 5                    | O2a2b1a1a5       | 56                   |
| D1a1a1a1a~ | 9                    | O1a1a1b1       | 4                    | O2a2b1a1a6       | 148                  |
| D1a1a1a2   | 46                   | O1a1a1b2       | 27                   | O2a2b1a2         | 28                   |
| D1a1a1a2b  | 8                    | O1a1a2         | 22                   | O2a2b1a2a        | 6                    |
| D1a2a1     | 3                    | O1a1a2a1       | 35                   | O2a2b1a2a1       | 99                   |
| D1a2a1a~   | 2                    | O1b            | 5                    | O2a2b1a2a1a3     | 34                   |
| D1a2a1b    | 171                  | O1b1a1         | 35                   | O2a2b1a2a1a3b1   | 5                    |
| D1a2a1b1   | 6                    | O1b1a1a        | 6                    | O2a2b1a2a1a3b2   | 39                   |
| D1a2a1b1a  | 66                   | O1b1a1a1a      | 19                   | O2a2b1a2a1a3b2b2 | 38                   |
| D1a2a1b2   | 15                   | O1b1a1a1a1a    | 6                    | Q                | 25                   |
| D1a2a1b3   | 3                    | O1b1a1a1a1a1   | 43                   | Q*               | 43                   |
| D1a2a1b~   | 7                    | O1b1a1a1a1a1b  | 1                    | Q1a2             | 15                   |
| DE         | 24                   | O1b1a1a1a1a1b1 | 6                    | Q1b              | 18                   |
| F2         | 4                    | O1b1a1a1a1a2   | 19                   | R                | 1                    |
| G          | 7                    | O1b1a1a1a1a1b  | 25                   | R1a1a            | 6                    |
| G2a        | 8                    | O1b1a1a1a1a1b1 | 22                   | R1a1a1b1a1       | 6                    |
| G2a2b      | 1                    | O1b1a1a1a1b    | 16                   | R1a1a1b1a2       | 4                    |
| G2a2b2a    | 3                    | O1b1a2a        | 29                   | R1a1a1b2         | 15                   |
| G2a2b2a1   | 15                   | O1b1a2b        | 12                   | R1a1a1b2a        | 11                   |
| H1a        | 11                   | O1b1a2c        | 5                    | R1a1a1b2a1a      | 1                    |
| H1a1a      | 8                    | O1b2           | 19                   | R1a1a1b2a1a1a    | 22                   |

|       |    |                     |    |              |    |
|-------|----|---------------------|----|--------------|----|
| H1a2a | 1  | O2                  | 24 | R1a1a1b2a2   | 48 |
| I     | 11 | O2a1                | 47 | R1a1a1b2a2a  | 70 |
| J1    | 29 | O2a1c               | 90 | R1a1a1b2a2b  | 4  |
| J2    | 18 | O2a1c1a             | 48 | R1a1a1b2a2b1 | 6  |
| J2a   | 35 | O2a1c1a1            | 31 | R1b          | 22 |
| J2a1  | 54 | O2a1c1a1a1          | 14 | R1b1a1       | 26 |
| J2a1a | 7  | O2a1c1a1a1a         | 32 | R1b1a1a2     | 8  |
| J2a1b | 3  | O2a1c1a1a1a1        | 14 | R2           | 13 |
| L     | 19 | O2a1c1a1a1a1a       | 10 | R2a          | 23 |
| LT    | 10 | O2a1c1a1a1a1a1a1    | 1  |              |    |
| N     | 2  | O2a1c1a1a1a1a1a1a1a | 2  |              |    |
| N1    | 17 | O2a1c1a1a1a1a1a1a1b | 4  |              |    |
| N1a   | 13 | O2a1c1a1a1a2        | 3  |              |    |

330

331



332 **Supplementary Material I: Application in another real case**

333 There was a target sample with Y-STR profile (unknown sample) and 25 reference samples that  
 334 have the least mismatch with the unknown sample, retrieved from local Y-STR database  
 335 (Supplementary figure 1).

336

| min     | DYS576 | DYS580 I | DYS635 | DYS580 II | DYS627 | DYS449 | DYS458 | DYS39 | Y-GATA H4 | DYS448 | DYS391 | DYS456 | DYS390 | DYS438 | DYS392 | DYS518 | DYS579 | DYS437 | DYS385 | DYS386 | DYS446 | DYS393 | DYS439 | DYS401 | DYS387 I | DYS387 II | DYS553 |
|---------|--------|----------|--------|-----------|--------|--------|--------|-------|-----------|--------|--------|--------|--------|--------|--------|--------|--------|--------|--------|--------|--------|--------|--------|--------|----------|-----------|--------|
| unknown | 19     | 11       | 20     | 28        | 18     | 9      | 18     | 14    | 12        | 20     | 10     | 15     | 23     | 11     | 14     | 37     | 17     | 15     | 15     | 19     | 33     | 12     | 12     | 23     | 35       | 40        | 11     |
| 1       | 19     | 12       | 20     | 20        | 19     | 9      | 18     | 14    | 12        | 20     | 10     | 15     | 23     | 11     | 14     | 37     | 17     | 15     | 15     | 19     | 33     | 12     | 12     | 23     | 35       | 40        | 11     |
| 2       | 19     | 12       | 20     | 20        | 20     | 9      | 18     | 14    | 12        | 20     | 10     | 15     | 23     | 11     | 14     | 37     | 17     | 15     | 15     | 19     | 33     | 12     | 12     | 23     | 35       | 40        | 11     |
| 3       | 19     | 12       | 20     | 20        | 21     | 9      | 18     | 14    | 12        | 20     | 10     | 15     | 23     | 11     | 14     | 37     | 17     | 15     | 15     | 19     | 33     | 12     | 12     | 23     | 35       | 40        | 11     |
| 4       | 19     | 12       | 20     | 20        | 19     | 9      | 18     | 14    | 12        | 20     | 10     | 15     | 23     | 11     | 14     | 37     | 17     | 15     | 15     | 19     | 33     | 12     | 12     | 24     | 35       | 40        | 11     |
| 5       | 19     | 12       | 20     | 20        | 19     | 9      | 18     | 14    | 12        | 20     | 10     | 15     | 23     | 11     | 14     | 38     | 17     | 15     | 15     | 19     | 33     | 12     | 12     | 23     | 35       | 40        | 11     |
| 6       | 19     | 12       | 20     | 20        | 21     | 9      | 18     | 14    | 12        | 20     | 10     | 15     | 23     | 11     | 14     | 37     | 17     | 15     | 15     | 19     | 32     | 12     | 12     | 23     | 35       | 40        | 11     |
| 7       | 19     | 12       | 20     | 20        | 20     | 9      | 17     | 14    | 12        | 20     | 10     | 15     | 23     | 11     | 14     | 37     | 17     | 15     | 15     | 19     | 33     | 12     | 12     | 23     | 35       | 40        | 11     |
| 8       | 19     | 12       | 20     | 20        | 20     | 9      | 18     | 14    | 12        | 20     | 10     | 15     | 23     | 11     | 14     | 37     | 17     | 15     | 15     | 19     | 32     | 12     | 12     | 23     | 35       | 39        | 11     |
| 9       | 19     | 12       | 20     | 20        | 18     | 9      | 18     | 14    | 12        | 20     | 10     | 15     | 23     | 11     | 14     | 38     | 17     | 15     | 15     | 19     | 33     | 12     | 12     | 23     | 35       | 39        | 11     |
| 10      | 19     | 12       | 20     | 20        | 21     | 9      | 18     | 14    | 12        | 20     | 10     | 15     | 23     | 11     | 14     | 37     | 17     | 15     | 15     | 19     | 32     | 12     | 12     | 23     | 35       | 40        | 11     |
| 11      | 20     | 12       | 20     | 20        | 22     | 9      | 18     | 14    | 12        | 20     | 10     | 15     | 23     | 11     | 14     | 37     | 17     | 15     | 15     | 19     | 32     | 12     | 12     | 23     | 35       | 40        | 11     |
| 12      | 19     | 12       | 20     | 20        | 21     | 9      | 18     | 14    | 12        | 20     | 10     | 12     | 23     | 11     | 14     | 37     | 17     | 15     | 15     | 19     | 32     | 12     | 12     | 23     | 35       | 40        | 11     |
| 13      | 19     | 12       | 20     | 20        | 22     | 9      | 18     | 14    | 12        | 20     | 10     | 12     | 23     | 11     | 14     | 37     | 17     | 15     | 15     | 19     | 32     | 12     | 12     | 23     | 35       | 40        | 11     |
| 14      | 19     | 12       | 20     | 20        | 19     | 9      | 18     | 14    | 12        | 20     | 10     | 15     | 23     | 11     | 14     | 37     | 17     | 15     | 15     | 19     | 33     | 12     | 12     | 23     | 35       | 39        | 11     |
| 15      | 19     | 12       | 20     | 20        | 20     | 9      | 18     | 14    | 12        | 20     | 10     | 15     | 22     | 11     | 14     | 37     | 17     | 15     | 15     | 19     | 33     | 12     | 12     | 23     | 35       | 40        | 11     |
| 16      | 19     | 12       | 20     | 20        | 20     | 9      | 18     | 14    | 12        | 20     | 10     | 15     | 23     | 11     | 14     | 37     | 17     | 15     | 15     | 19     | 32     | 12     | 12     | 23     | 35       | 40        | 11     |
| 17      | 19     | 12       | 20     | 20        | 20     | 9      | 18     | 14    | 12        | 20     | 10     | 15     | 23     | 11     | 14     | 37     | 17     | 15     | 15     | 19     | 32     | 12     | 12     | 23     | 35       | 40        | 11     |
| 18      | 19     | 12       | 20     | 20        | 19     | 9      | 18     | 14    | 12        | 20     | 10     | 15     | 23     | 11     | 14     | 37     | 17     | 15     | 15     | 19     | 33     | 12     | 12     | 23     | 35       | 38        | 11     |
| 19      | 20     | 12       | 20     | 20        | 20     | 9      | 18     | 14    | 12        | 20     | 10     | 15     | 23     | 11     | 14     | 37     | 17     | 15     | 15     | 19     | 32     | 12     | 12     | 23     | 35       | 42        | 11     |
| 20      | 19     | 12       | 20     | 20        | 21     | 9      | 18     | 14    | 12        | 20     | 10     | 15     | 22     | 11     | 14     | 37     | 17     | 15     | 15     | 19     | 33     | 12     | 12     | 23     | 35       | 40        | 11     |
| 21      | 21     | 12       | 20     | 20        | 20     | 9      | 18     | 14    | 12        | 20     | 10     | 15     | 23     | 11     | 14     | 37     | 17     | 15     | 15     | 19     | 31     | 12     | 12     | 23     | 35       | 40        | 11     |

337

338 **Supplementary figure 1. Haplotypes of a target sample and reference samples**

339

340 Here questions came. Which samples are from the same male lineage as the unknown sample?

341 What is the ranking of the reference samples according to the closeness to the unknown sample?

342

343 We used the software to compare the similarity of the unknown sample and the reference

344 samples. Because of the different principles behind the algorithms, we calculated similarity

345 score between the unknown sample and 25 reference samples and concluded that reference

346 sample 23 is the closest to the unknown sample. The steps are as follows.

347

348 First, we calculated the similarity score of these reference samples to the unknown samples in

349 three models (Supplementary table 2, Supplementary figure 2):

350

351 **Supplementary table 2.** Similarity score of these reference samples to the unknown samples

352 in three models.

| Reference sample | Logistic Regression | SVM | Random Forest |
|------------------|---------------------|-----|---------------|
|------------------|---------------------|-----|---------------|

|    |          |          |          |
|----|----------|----------|----------|
| 1  | 0.992562 | 0.996092 | 0.999531 |
| 2  | 0.974887 | 0.9937   | 0.996514 |
| 3  | 0.954657 | 0.995065 | 0.996975 |
| 4  | 0.993527 | 0.998197 | 0.999751 |
| 5  | 0.983984 | 0.996739 | 0.999284 |
| 6  | 0.953399 | 0.994144 | 0.996468 |
| 7  | 0.927685 | 0.98888  | 0.998367 |
| 8  | 0.976826 | 0.989644 | 0.978107 |
| 9  | 0.98839  | 0.998236 | 0.978932 |
| 10 | 0.953399 | 0.994144 | 0.996468 |
| 11 | 0.946554 | 0.970426 | 0.993781 |
| 12 | 0.955503 | 0.937706 | 0.995788 |
| 13 | 0.938212 | 0.859445 | 0.996212 |
| 14 | 0.991501 | 0.991767 | 0.977985 |
| 15 | 0.977748 | 0.992833 | 0.996146 |
| 16 | 0.958325 | 0.988286 | 0.997434 |
| 17 | 0.958325 | 0.988286 | 0.997434 |
| 18 | 0.978671 | 0.98716  | 0.976332 |
| 19 | 0.979954 | 0.82383  | 0.994687 |
| 20 | 0.96622  | 0.995185 | 0.9964   |
| 21 | 0.972685 | 0.915663 | 0.977023 |
| 22 | 0.995496 | 0.999301 | 0.999899 |
| 23 | 0.999982 | 1        | 1        |
| 24 | 0.991264 | 0.997862 | 0.999859 |
| 25 | 0.988588 | 0.999885 | 0.999936 |

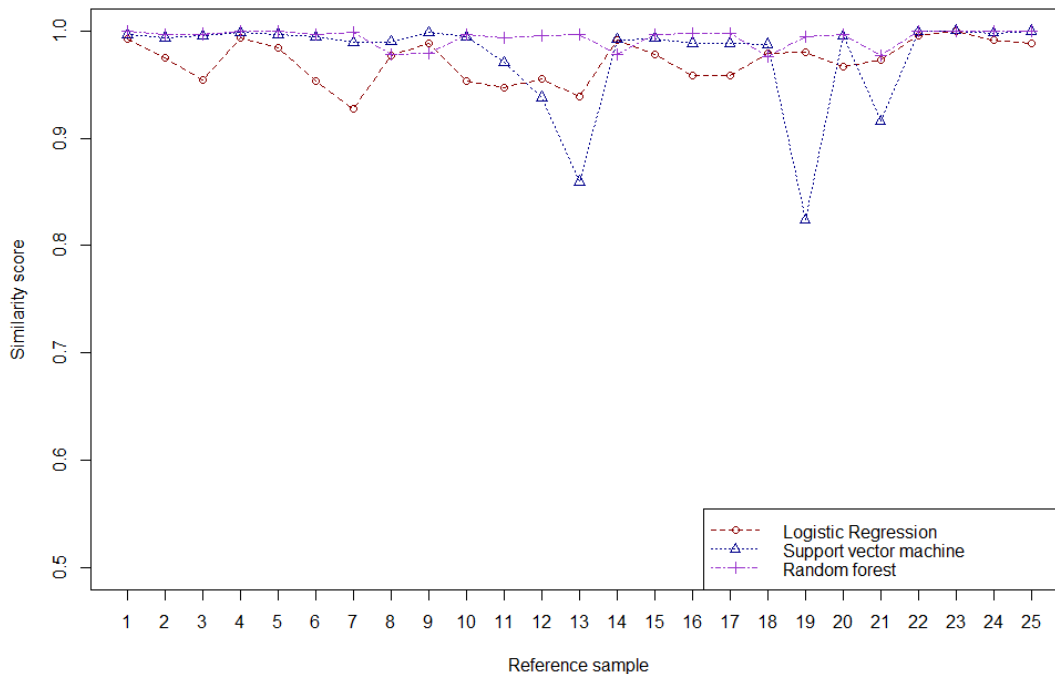

353  
354

**Supplementary figure 2.** The line plot of the similarity of the unknown sample and the

355

reference samples

356

357 Then, based on the accuracy in **Table 1**, we calculated the weighted similarity score

358 (**Supplementary table 3, Supplementary figure 3**):

359

360 **Supplementary table 3.** Weighted similarity score by the accuracy of different models.

| Reference sample | Logistic Regression (weighted) | SVM (weighted) | Random Forest (weighted) |
|------------------|--------------------------------|----------------|--------------------------|
| 1                | 0.664024                       | 0.692284       | 0.769639                 |
| 2                | 0.652199                       | 0.690621       | 0.767316                 |
| 3                | 0.638666                       | 0.69157        | 0.767671                 |
| 4                | 0.664669                       | 0.693747       | 0.769808                 |
| 5                | 0.658285                       | 0.692733       | 0.769448                 |
| 6                | 0.637824                       | 0.69093        | 0.767281                 |
| 7                | 0.620621                       | 0.687271       | 0.768742                 |
| 8                | 0.653497                       | 0.687803       | 0.753142                 |
| 9                | 0.661233                       | 0.693774       | 0.753777                 |
| 10               | 0.637824                       | 0.69093        | 0.767281                 |
| 11               | 0.633245                       | 0.674446       | 0.765211                 |
| 12               | 0.639231                       | 0.651705       | 0.766756                 |
| 13               | 0.627664                       | 0.597314       | 0.767083                 |
| 14               | 0.663314                       | 0.689278       | 0.753049                 |
| 15               | 0.654114                       | 0.690019       | 0.767032                 |
| 16               | 0.641119                       | 0.686859       | 0.768024                 |
| 17               | 0.641119                       | 0.686859       | 0.768024                 |
| 18               | 0.654731                       | 0.686076       | 0.751776                 |
| 19               | 0.655589                       | 0.572562       | 0.765909                 |
| 20               | 0.646401                       | 0.691653       | 0.767228                 |
| 21               | 0.650726                       | 0.636386       | 0.752308                 |
| 22               | 0.665986                       | 0.694515       | 0.769922                 |
| 23               | 0.668988                       | 0.695          | 0.77                     |
| 24               | 0.663156                       | 0.693514       | 0.769891                 |
| 25               | 0.661366                       | 0.69492        | 0.769951                 |

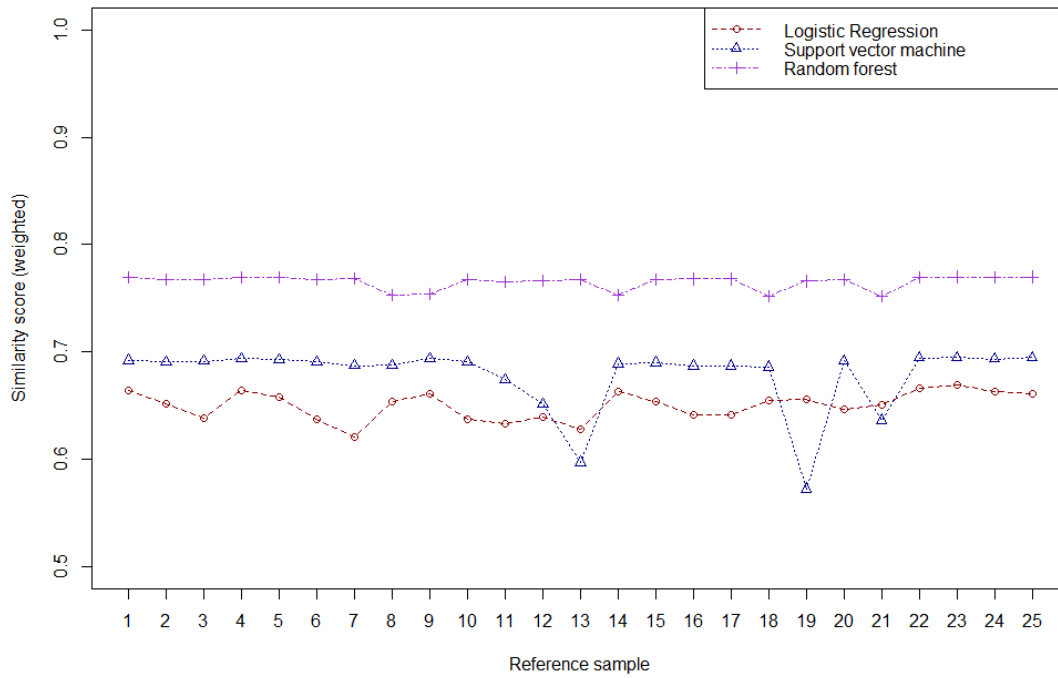

361  
 362 **Supplementary figure 3.** The line plot of the weighted similarity score of the unknown  
 363 sample and the reference samples:

364  
 365 Finally, the ranking of the reference samples is based on the mean value of three weighted  
 366 scores (**Supplementary table 4**):

367  
 368 **Supplementary table 4.** The ranking of the closeness to the unknown sample.

| Reference sample | weighted score |
|------------------|----------------|
| 23               | 0.711329168    |
| 22               | 0.710141087    |
| 4                | 0.709408108    |
| 24               | 0.708853689    |
| 25               | 0.708745317    |
| 1                | 0.708648946    |
| 5                | 0.706822429    |
| 15               | 0.703721642    |
| 2                | 0.703378919    |
| 9                | 0.702928022    |
| 14               | 0.701880327    |
| 20               | 0.701760818    |
| 3                | 0.699302072    |

|    |             |
|----|-------------|
| 6  | 0.698678134 |
| 10 | 0.698678134 |
| 16 | 0.698667317 |
| 17 | 0.698667317 |
| 8  | 0.698147231 |
| 18 | 0.697527623 |
| 7  | 0.692211636 |
| 11 | 0.690967345 |
| 12 | 0.685897656 |
| 21 | 0.679806661 |
| 19 | 0.66468681  |
| 13 | 0.66402034  |

369 In conclusion, the reference sample 23 is the closest to the unknown sample, followed by  
370 reference 22, 4,24, ..., 13.

371

372 **Supplementary Material II: YHP input files**

373 **II-1 “Match&Count” for mismatch analysis**

374 Input file includes sample ID (necessary), population, haplogroup and Y-STR (necessary)  
 375 genotypes (Supplementary figure 4).

|    | A                           | B          | C           | D      | E       | F      | G        | H      | I      | J      | K     | L       |
|----|-----------------------------|------------|-------------|--------|---------|--------|----------|--------|--------|--------|-------|---------|
| 1  | SampleID(population-region) | population | Haplogroup  | DYS576 | DYS389I | DYS635 | DYS389II | DYS627 | DYS460 | DYS458 | DYS19 | YGATAH4 |
| 2  | BJ-1(Han-Beijing)           | Han        | O2a2b1a1a1  | 18     | 12      | 20     | 28       | 21     | 10     | 18     | 14    | 12      |
| 3  | BJ-2(Han-Beijing)           | Han        | O2a2b1a1a1  | 18     | 12      | 20     | 28       | 21     | 10     | 18     | 14    | 12      |
| 4  | BJ-100(Han-Beijing)         | Hui        | O2a2b1a1a1  | 19     | 14      | 22     | 31       | 21     | 10     | 18     | 15    | 12      |
| 5  | BJ-101(Han-Beijing)         | Han        | O2a2b       | 19     | 12      | 21     | 28       | 21     | 9      | 19     | 14    | 11      |
| 6  | BJ-102(Han-Beijing)         | Han        | O2a2b1a1a   | 18     | 12      | 19     | 28       | 19     | 9      | 18     | 15    | 11      |
| 7  | BJ-103(Han-Beijing)         | Hui        | N1b         | 18     | 14      | 23     | 30       | 21     | 10     | 15     | 14    | 11      |
| 8  | BJ-104(Han-Beijing)         | Han        | O2a1c1a1e   | 17     | 12      | 21     | 28       | 21     | 10     | 18     | 15    | 12      |
| 9  | BJ-105(Han-Beijing)         | Han        | C2c1a2b     | 14     | 13      | 20     | 30       | 22     | 10     | 17     | 16    | 12      |
| 10 | BJ-106(Han-Beijing)         | Han        | O1a1a1a1a1a | 18     | 12      | 19     | 29       | 24     | 10     | 15     | 15    | 12      |
| 11 | BJ-107(Han-Beijing)         | Han        | N1b         | 16     | 13      | 23     | 29       | 22     | 10     | 15     | 14    | 12      |
| 12 | BJ-111(Han-Beijing)         | hhh        | O1b2        | 17     | 13      | 21     | 28       | 19     | 11     | 17     | 15    | 11      |
| 13 | BJ-108(Han-Beijing)         | Han        | O1b2        | 17     | 13      | 21     | 28       | 19     | 11     | 17     | 15    | 11      |
| 14 | BJ-109(Han-Beijing)         | Han        | O2a1c1a     | 18     | 12      | 21     | 29       | 19     | 10     | 19     | 17    | 11      |

376

377 **Supplementary figure 4.** Example file: input1

378

379 **II-2 “Predict” for haplogroup prediction**

380 Input file includes sample ID and Y-STR genotypes (single sample: **Supplementary figure 5**;  
 381 multiple sample: **Supplementary figure 6**).

382

383 **II-2-1 Single sample mode**

|   | A        | B          | C          | D      | E       | F      | G        | H      | I      | J      | K     | L       |
|---|----------|------------|------------|--------|---------|--------|----------|--------|--------|--------|-------|---------|
| 1 | SampleID | population | Haplogroup | DYS576 | DYS389I | DYS635 | DYS389II | DYS627 | DYS460 | DYS458 | DYS19 | YGATAH4 |
| 2 | unknown  |            |            | 19     | 12      | 20     | 28       | 18     | 9      | 18     | 14    | 12      |

384

385 **Supplementary figure 5.** Example file: input2

386

387 **II-2-2 Multiple sample mode**

|    | A        | B          | C          | D      | E       | F      | G        | H      | I      | J      | K     | L       |
|----|----------|------------|------------|--------|---------|--------|----------|--------|--------|--------|-------|---------|
| 1  | SampleID | population | Haplogroup | DYS576 | DYS389I | DYS635 | DYS389II | DYS627 | DYS460 | DYS458 | DYS19 | YGATAH4 |
| 2  | unknown  |            |            | 19     | 12      | 20     | 28       | 18     | 9      | 18     | 14    | 12      |
| 3  | 1        |            |            | 19     | 12      | 20     | 28       | 19     | 9      | 18     | 14    | 12      |
| 4  | 2        |            |            | 19     | 12      | 20     | 28       | 20     | 9      | 18     | 14    | 12      |
| 5  | 3        |            |            | 19     | 12      | 20     | 28       | 21     | 9      | 18     | 14    | 12      |
| 6  | 4        |            |            | 19     | 12      | 20     | 28       | 19     | 9      | 18     | 14    | 12      |
| 7  | 5        |            |            | 19     | 12      | 20     | 28       | 19     | 9      | 18     | 14    | 12      |
| 8  | 6        |            |            | 19     | 12      | 20     | 28       | 21     | 9      | 18     | 14    | 12      |
| 9  | 7        |            |            | 19     | 12      | 20     | 28       | 22     | 9      | 17     | 14    | 12      |
| 10 | 8        |            |            | 19     | 12      | 20     | 28       | 20     | 9      | 18     | 14    | 12      |
| 11 | 9        |            |            | 19     | 12      | 20     | 28       | 18     | 9      | 18     | 14    | 12      |
| 12 | 10       |            |            | 19     | 12      | 20     | 28       | 21     | 9      | 18     | 14    | 12      |
| 13 | 11       |            |            | 20     | 12      | 20     | 28       | 22     | 9      | 18     | 14    | 12      |
| 14 | 12       |            |            | 19     | 12      | 20     | 28       | 21     | 9      | 18     | 14    | 12      |
| 15 | 13       |            |            | 19     | 12      | 20     | 28       | 22     | 9      | 18     | 14    | 12      |
| 16 | 14       |            |            | 19     | 12      | 20     | 28       | 19     | 9      | 18     | 14    | 12      |
| 17 | 15       |            |            | 19     | 12      | 20     | 28       | 20     | 9      | 18     | 14    | 12      |
| 18 | 16       |            |            | 18     | 12      | 20     | 28       | 20     | 9      | 18     | 14    | 12      |
| 19 | 17       |            |            | 18     | 12      | 20     | 28       | 20     | 9      | 18     | 14    | 12      |
| 20 | 18       |            |            | 18     | 12      | 20     | 28       | 19     | 9      | 18     | 14    | 12      |
| 21 | 19       |            |            | 20     | 12      | 20     | 28       | 20     | 9      | 18     | 14    | 12      |
| 22 | 20       |            |            | 19     | 12      | 20     | 28       | 21     | 9      | 18     | 14    | 12      |
| 23 | 21       |            |            | 21     | 12      | 20     | 28       | 20     | 9      | 18     | 14    | 12      |

388

389 **Supplementary figure 6.** Example file: input3. The line in blue background is the unknown  
 390 sample and the lines below that are reference samples.

391

392 **II-3 “Similarity” for similarity scoring**

393 Input file includes sample ID and Y-STR genotypes of the unknown sample and the reference  
 394 samples (same as II-2-2). When there is no reference sample, the output file is mismatch result  
 395 of the unknown sample and all samples in the database.

396

397 **Supplementary Material III: YHP pipeline**

398 For the first function Match&Count, the interface is as follow (**Supplementary figure 7 and**

399 **8**). Click the buttons to choose the input file and comparison mode.

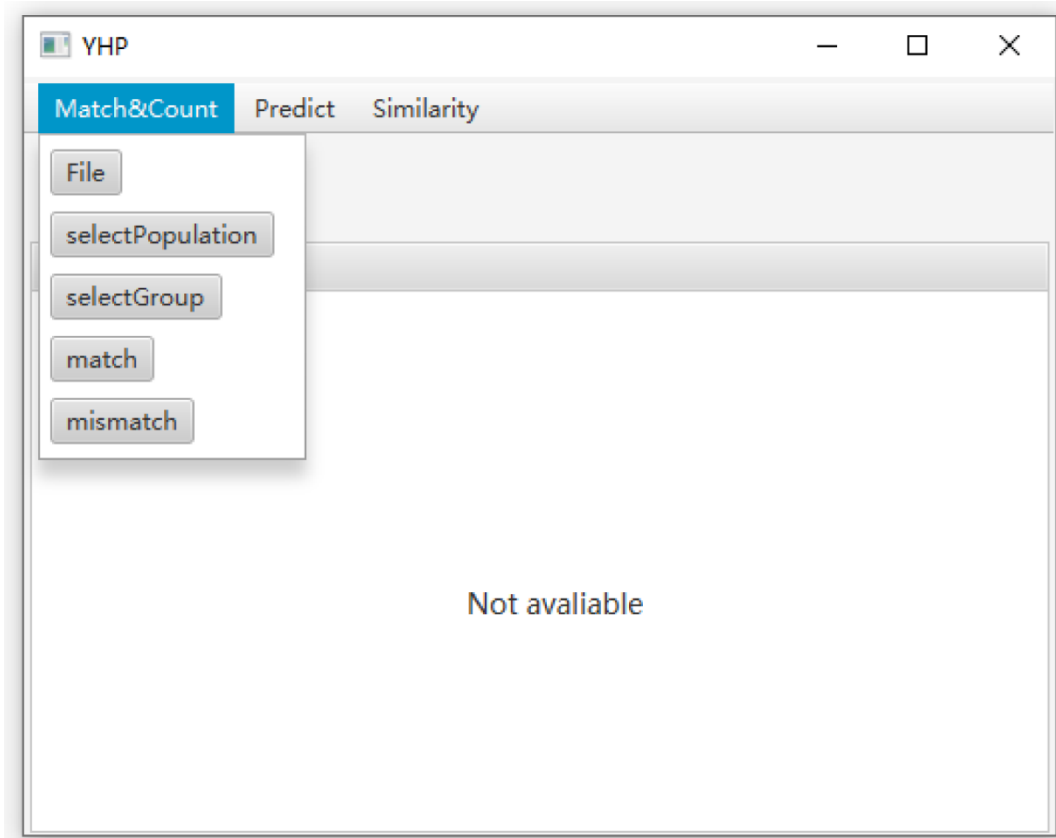

400

401

**Supplementary figure 7.** Software interface for Match&Count.



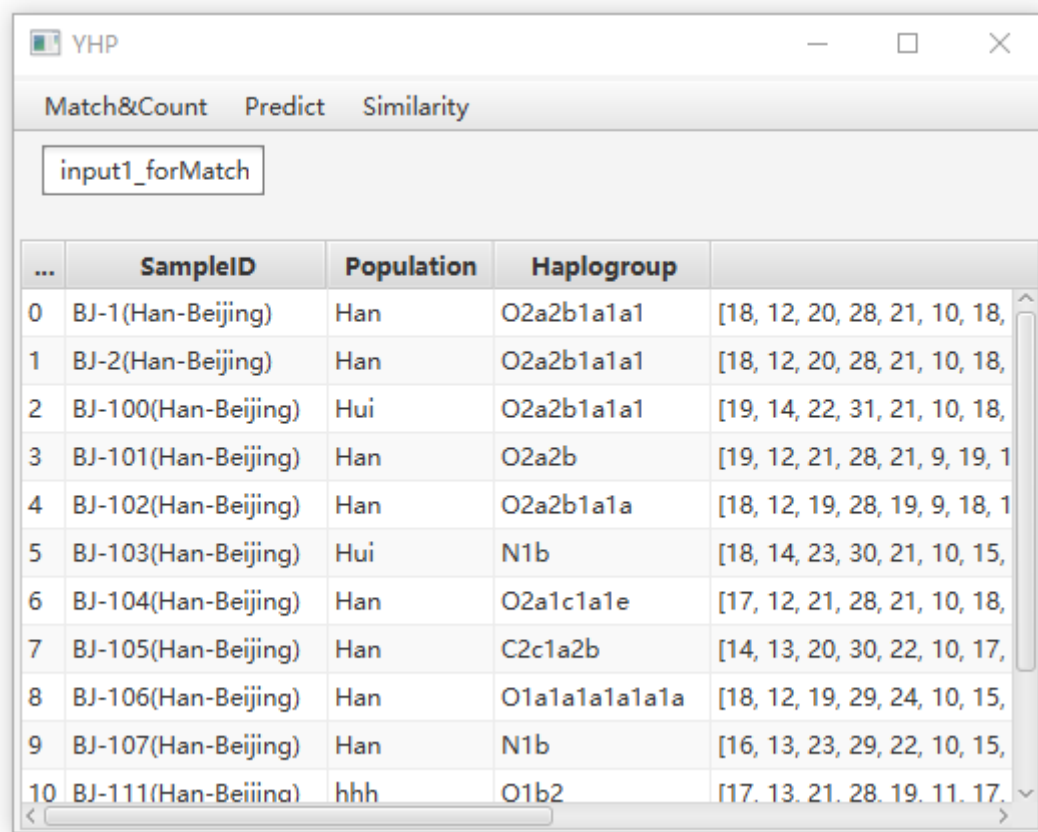

The screenshot shows the YHP software interface. At the top, there are three tabs: "Match&Count", "Predict", and "Similarity". Below the tabs is a text input field containing "input1\_forMatch". The main area of the window displays a table with the following data:

| ... | SampleID             | Population | Haplogroup    |                               |
|-----|----------------------|------------|---------------|-------------------------------|
| 0   | BJ-1(Han-Beijing)    | Han        | O2a2b1a1a1    | [18, 12, 20, 28, 21, 10, 18,  |
| 1   | BJ-2(Han-Beijing)    | Han        | O2a2b1a1a1    | [18, 12, 20, 28, 21, 10, 18,  |
| 2   | BJ-100(Han-Beijing)  | Hui        | O2a2b1a1a1    | [19, 14, 22, 31, 21, 10, 18,  |
| 3   | BJ-101(Han-Beijing)  | Han        | O2a2b         | [19, 12, 21, 28, 21, 9, 19, 1 |
| 4   | BJ-102(Han-Beijing)  | Han        | O2a2b1a1a     | [18, 12, 19, 28, 19, 9, 18, 1 |
| 5   | BJ-103(Han-Beijing)  | Hui        | N1b           | [18, 14, 23, 30, 21, 10, 15,  |
| 6   | BJ-104(Han-Beijing)  | Han        | O2a1c1a1e     | [17, 12, 21, 28, 21, 10, 18,  |
| 7   | BJ-105(Han-Beijing)  | Han        | C2c1a2b       | [14, 13, 20, 30, 22, 10, 17,  |
| 8   | BJ-106(Han-Beijing)  | Han        | O1a1a1a1a1a1a | [18, 12, 19, 29, 24, 10, 15,  |
| 9   | BJ-107(Han-Beijing)  | Han        | N1b           | [16, 13, 23, 29, 22, 10, 15,  |
| 10  | BJ-111(Han-Beijiina) | hhh        | O1b2          | [17, 13, 21, 28, 19, 11, 17,  |

402

403

**Supplementary figure 8.** Software interface after the input file was chosen.

404

405 For the second function Predict, the interface is as follow (**Supplementary figure 9 and 10**).

406 In this step, training data is changeable, whether using default dataset (generated in our lab as

407 described above) or customized data (haplotypes with haplogroup information). If one uses

408 customized data, the number of Y-STR loci is flexible, not having to be 27, but the test data

409 should be consistent with the training data. After selection test data, click “Train” first, and then

410 “Test”.

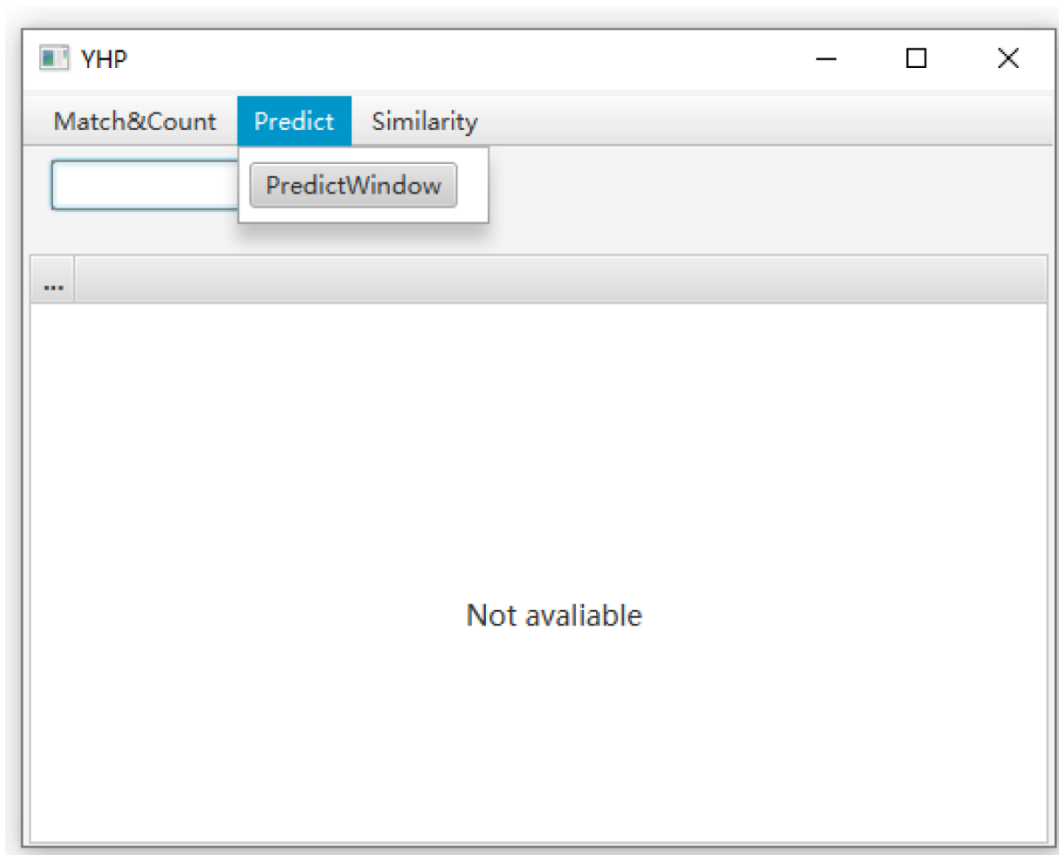

411

412

**Supplementary figure 9.** Software interface for Predict.

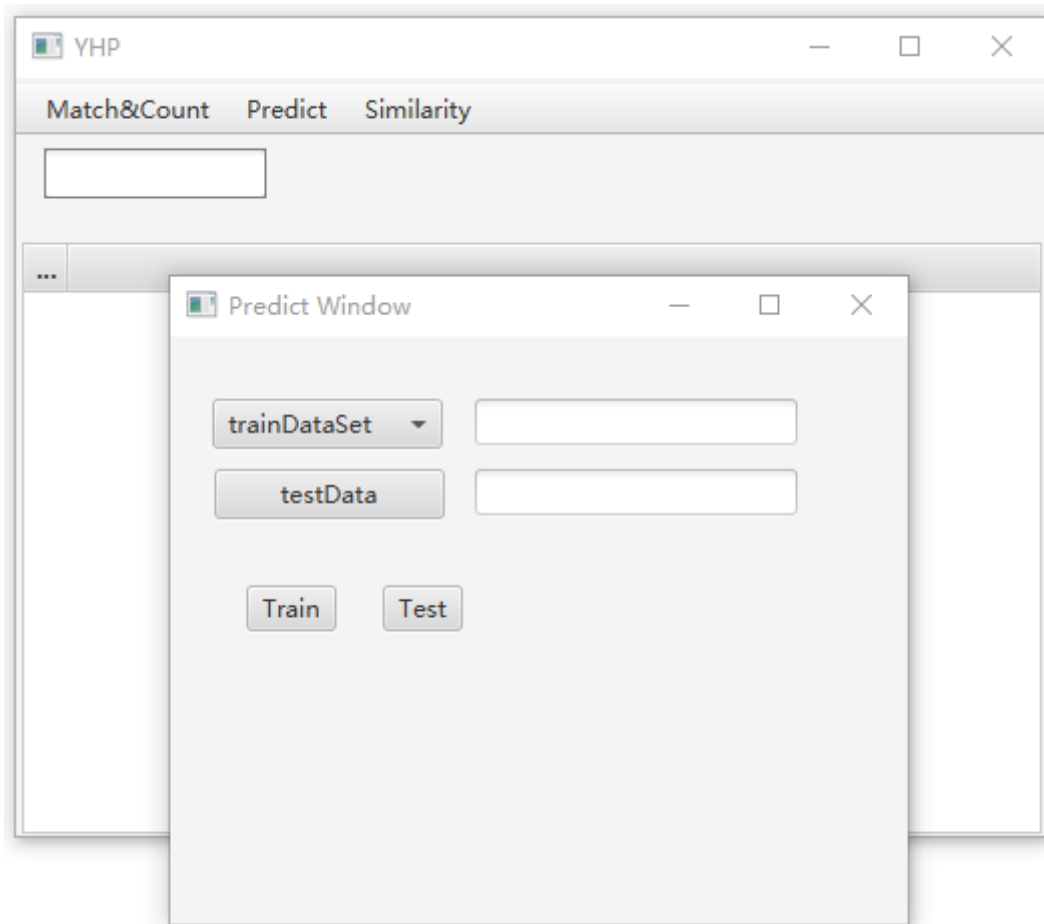

413

414 **Supplementary figure 10.** Software interface when choosing training data and test data.

415

416 For the third function Similarity, the interface is as follow (**Supplementary figure 11, 12 and**  
417 **13**). There are two comparison mode, “withDatabase” and “withinSamples”, which require  
418 different input files as illustrated previously in the input section.

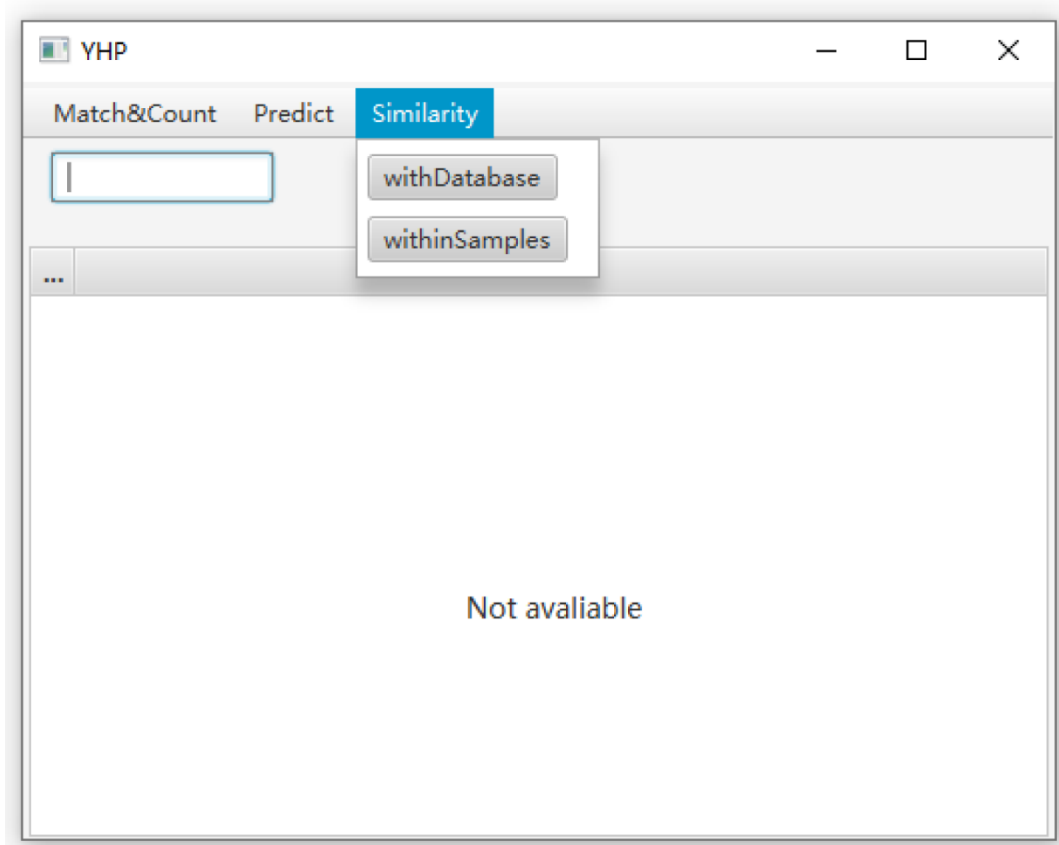

419

420

**Supplementary figure 11.** Software interface for Similarity.

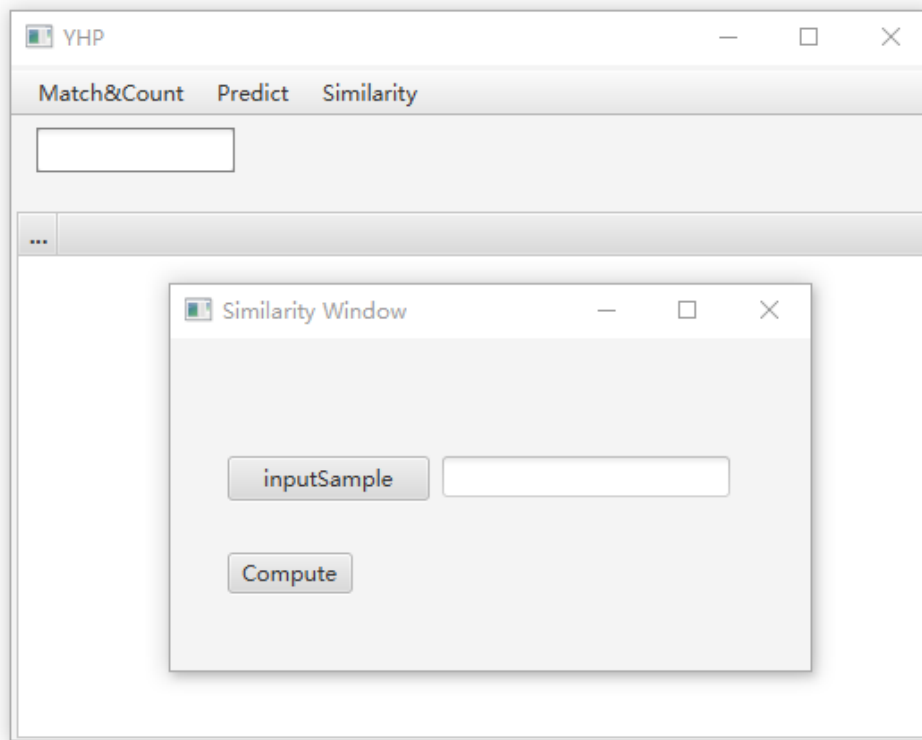

421

422 **Supplementary figure 12.** Software interface for Similarity in “withDatabase” mode.

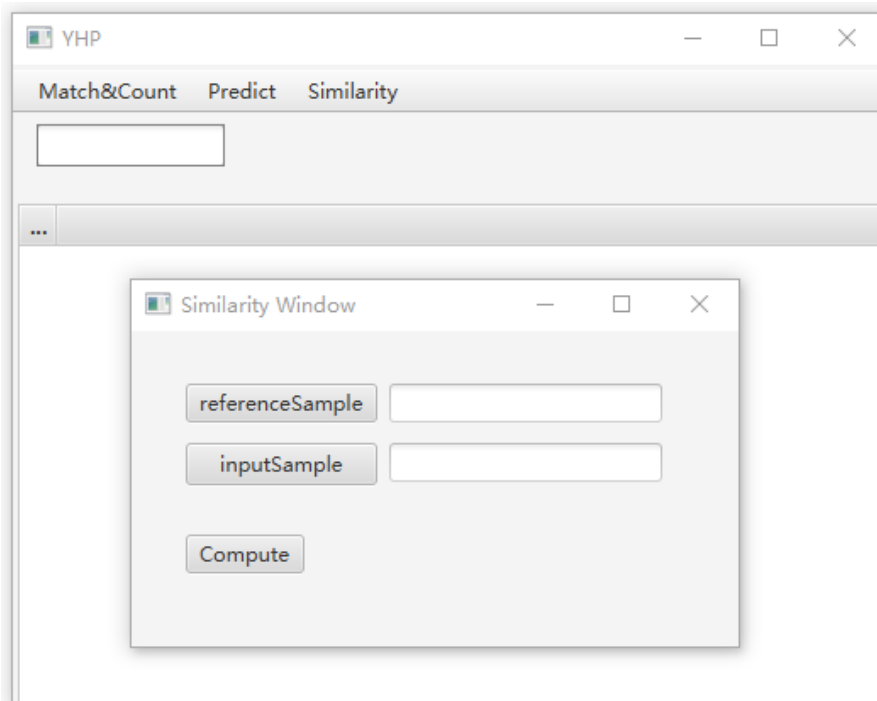

423

424 **Supplementary figure 13.** Software interface for Similarity in “withinSamples” mode

425

426 **Supplementary Material IV: Output results**

427 The output files can be saved manually or automatically in file container “output”.

428 **IV-1 Match&Count**

429 The file can be saved in the main window after mismatch analysis. The output result includes  
 430 match/mismatch number, step, ratio, and mismatch detail (**Supplementary figure 14** is one of  
 431 the output results in this function).

|    | A                                       | B              | C                    | D           | E             | F             | G                           | H |
|----|-----------------------------------------|----------------|----------------------|-------------|---------------|---------------|-----------------------------|---|
| 1  | samplePair                              | populationPair | groupPair            | misMatchNum | misMatchSteps | misMatchRatio | misMatchDetail              |   |
| 2  | BJ-101(Han-Beijing),BJ-111(Han-Beijing) | Han,hhh        | O2a2b,O1b2           | 20          | 37            | 1.85          | 2(19,17),1(12,13),0(21,21), |   |
| 3  | BJ-102(Han-Beijing),BJ-111(Han-Beijing) | Han,hhh        | O2a2b1a1a,O1b2       | 18          | 35            | 1.94          | 1(18,17),1(12,13),2(19,21), |   |
| 4  | BJ-111(Han-Beijing),BJ-109(Han-Beijing) | hhh,Han        | O1b2,O2a1c1a         | 17          | 27            | 1.59          | 1(17,18),1(13,12),0(21,21), |   |
| 5  | BJ-1(Han-Beijing),BJ-111(Han-Beijing)   | Han,hhh        | O2a2b1a1a,O1b2       | 20          | 30            | 1.5           | 1(18,17),1(12,13),1(20,21), |   |
| 6  | BJ-2(Han-Beijing),BJ-111(Han-Beijing)   | Han,hhh        | O2a2b1a1a,O1b2       | 20          | 30            | 1.5           | 1(18,17),1(12,13),1(20,21), |   |
| 7  | BJ-104(Han-Beijing),BJ-111(Han-Beijing) | Han,hhh        | O2a1c1a1e,O1b2       | 17          | 31            | 1.82          | 0(17,17),1(12,13),0(21,21), |   |
| 8  | BJ-105(Han-Beijing),BJ-111(Han-Beijing) | Han,hhh        | C2c1a2b,O1b2         | 21          | 35            | 1.67          | 3(14,17),0(13,13),1(20,21), |   |
| 9  | BJ-107(Han-Beijing),BJ-111(Han-Beijing) | Han,hhh        | N1b,O1b2             | 21          | 40            | 1.9           | 1(16,17),0(13,13),2(23,21), |   |
| 10 | BJ-106(Han-Beijing),BJ-111(Han-Beijing) | Han,hhh        | O1a1a1a1a1a,O1b2     | 21          | 39            | 1.86          | 1(18,17),1(12,13),2(19,21), |   |
| 11 | BJ-103(Han-Beijing),BJ-106(Han-Beijing) | Hui,Han        | N1b,O1a1a1a1a1a      | 18          | 36            | 2             | 0(18,18),2(14,12),4(23,19), |   |
| 12 | BJ-100(Han-Beijing),BJ-104(Han-Beijing) | Hui,Han        | O2a2b1a1a1,O2a1c1a1e | 16          | 34            | 2.13          | 2(19,17),2(14,12),1(22,21), |   |
| 13 | BJ-100(Han-Beijing),BJ-108(Han-Beijing) | Hui,Han        | O2a2b1a1a1,O1b2      | 21          | 41            | 1.95          | 2(19,17),1(14,13),1(22,21), |   |
| 14 | BJ-103(Han-Beijing),BJ-109(Han-Beijing) | Hui,Han        | N1b,O2a1c1a          | 16          | 40            | 2.5           | 0(18,18),2(14,12),2(23,21), |   |
| 15 | BJ-100(Han-Beijing),BJ-105(Han-Beijing) | Hui,Han        | O2a2b1a1a1,C2c1a2b   | 23          | 38            | 1.65          | 5(19,14),1(14,13),2(22,20), |   |
| 16 | BJ-103(Han-Beijing),BJ-108(Han-Beijing) | Hui,Han        | N1b,O1b2             | 20          | 41            | 2.05          | 1(18,17),1(14,13),2(23,21), |   |
| 17 | BJ-100(Han-Beijing),BJ-102(Han-Beijing) | Hui,Han        | O2a2b1a1a1,O2a2b1a1a | 20          | 36            | 1.8           | 1(19,18),2(14,12),3(22,19), |   |
| 18 | BJ-103(Han-Beijing),BJ-105(Han-Beijing) | Hui,Han        | N1b,C2c1a2b          | 18          | 40            | 2.22          | 4(18,14),1(14,13),3(23,20), |   |

433 **Supplementary figure 14.** Output file for Match&Count.

434

435 **IV-2 Predict**

436 The predicting result (single sample: **Supplementary figure 15**; multiple sample:

437 **Supplementary figure 16**) is saved automatically in file container “output”.

|   | A                  | B                   |
|---|--------------------|---------------------|
| 1 | DATABASE           |                     |
| 2 |                    | unknown             |
| 3 | knn                | O2a2a1 (1. 0)       |
| 4 | naiveBayes         | R2a (1. 0)          |
| 5 | logisticRegression | O1b1a1 (0. 02)      |
| 6 | svm                | O2a1c (0. 057)      |
| 7 | decesionTree       | O2a2b1a1a1 (1. 0)   |
| 8 | randomForest       | O2a2b1a1a4 (0. 382) |

438

439

**Supplementary figure 15.** Single sample prediction result.

|   | A                  | B                 | C                 | D                 | E                 | F                 | G                 | H                 | I                 | J                 |
|---|--------------------|-------------------|-------------------|-------------------|-------------------|-------------------|-------------------|-------------------|-------------------|-------------------|
| 1 | DATABASE           |                   |                   |                   |                   |                   |                   |                   |                   |                   |
| 2 |                    | unknown           | 1.0               | 2.0               | 3.0               | 4.0               | 5.0               | 6.0               | 7.0               | 8.0               |
| 3 | knn                | O2a2a1(1.0)       | O2a2a1(1.0)       | O2a2a1(1.0)       | O2a2a1(1.0)       | O2a2a1(1.0)       | O2a2a1(1.0)       | O2a2a1(1.0)       | O2a2a1(1.0)       | O2a2a1(1.0)       |
| 4 | naiveBayes         | R2a(1.0)          | R2a(1.0)          | R2a(1.0)          | R2a(1.0)          | R2a(1.0)          | R2a(1.0)          | R2a(1.0)          | R2a(1.0)          | R2a(1.0)          |
| 5 | logisticRegression | O1b1a1(0.02)      | O1b1a1(0.02)      | O1b1a1(0.02)      | O1b1a1(0.02)      | O1b1a1(0.02)      | O1b1a1(0.02)      | O1b1a1(0.02)      | O1b1a1(0.02)      | O1b1a1(0.02)      |
| 6 | svm                | O2a1c(0.057)      | O2a1c(0.057)      | O2a1c(0.057)      | O2a1c(0.057)      | O2a1c(0.057)      | O2a1c(0.057)      | O2a1c(0.057)      | O2a1c(0.057)      | O2a1c(0.057)      |
| 7 | decisionTree       | O2a2b1a1a1(1.0)   | O2a2b1a1a1(1.0)   | O2a2b1a1a1(1.0)   | O2a2b1a1a1(1.0)   | O2a2b1a1a1(1.0)   | O2a2b1a1a1(1.0)   | O2a2b1a1a1(1.0)   | O2a2b1a1a1(1.0)   | O2a2b1a1a1(1.0)   |
| 8 | randomForest       | O2a2b1a1a4(0.382) | O2a2b1a1a4(0.394) | O2a2b1a1a4(0.418) | O2a2b1a1a4(0.435) | O2a2b1a1a4(0.452) | O2a2b1a1a4(0.469) | O2a2b1a1a4(0.486) | O2a2b1a1a4(0.503) | O2a2b1a1a4(0.520) |

440

441

**Supplementary figure 16.** Multiple sample prediction result.

442

**IV-3. Similarity**

444

The similarity result (withDatabase: **Supplementary figure 17**; withinsamples:

445

**Supplementary figure 18**) is saved automatically in file container “output”.

|   | A                 | B        | C                    | D           | E          | F          |
|---|-------------------|----------|----------------------|-------------|------------|------------|
| 1 | sample            | MinOrMax | referenceSample      | misMatchNum | population | group      |
| 2 | BJ-1(Han-Beijing) | MIN      | BJ-1(Han-Beijing)    | 0           | Han        | O2a2b1a1a1 |
| 3 | BJ-1(Han-Beijing) | MAX      | LS48(Tibetan-Lhasa)  | 26          | Tibetan    | D1a2a1b1   |
| 4 | BJ-1(Han-Beijing) | MAX      | AB29(Tibetan-Ngawa)  | 26          | Tibetan    | D1a2a1b1a  |
| 5 | BJ-1(Han-Beijing) | MAX      | RK54(Tibetan-Xigaze) | 26          | Tibetan    | D1a2a1b    |

446

447

**Supplementary figure 17.** Similarity result in “withDatabase”. MIN indicates the closest

448

sample between the target sample and samples in the database; MAX indicates the least

449

closest sample.

|    | A                  | B                    | C                  | D |
|----|--------------------|----------------------|--------------------|---|
| 1  | method             |                      | BJ-1 (Han-Beijing) |   |
| 2  | knn                | BJ-1 (Han-Beijing)   | 1.0                |   |
| 3  |                    | BJ-2 (Han-Beijing)   | 1.0                |   |
| 4  |                    | BJ-100 (Han-Beijing) | 0.5                |   |
| 5  |                    | BJ-101 (Han-Beijing) | 0.5                |   |
| 6  |                    | BJ-102 (Han-Beijing) | 0.5                |   |
| 7  |                    | BJ-103 (Han-Beijing) | 0.5                |   |
| 8  |                    | BJ-104 (Han-Beijing) | 0.5                |   |
| 9  |                    | BJ-105 (Han-Beijing) | 0.5                |   |
| 10 |                    | BJ-106 (Han-Beijing) | 0.5                |   |
| 11 |                    | BJ-107 (Han-Beijing) | 0.5                |   |
| 12 |                    | BJ-111 (Han-Beijing) | 0.5                |   |
| 13 |                    | BJ-108 (Han-Beijing) | 0.5                |   |
| 14 |                    | BJ-109 (Han-Beijing) | 0.5                |   |
| 15 | naiveBayes         | BJ-1 (Han-Beijing)   | 1.0                |   |
| 16 |                    | BJ-2 (Han-Beijing)   | 1.0                |   |
| 17 |                    | BJ-100 (Han-Beijing) | 0.5                |   |
| 18 |                    | BJ-101 (Han-Beijing) | 0.5                |   |
| 19 |                    | BJ-102 (Han-Beijing) | 0.51369            |   |
| 20 |                    | BJ-103 (Han-Beijing) | 0.5                |   |
| 21 |                    | BJ-104 (Han-Beijing) | 0.5                |   |
| 22 |                    | BJ-105 (Han-Beijing) | 0.5                |   |
| 23 |                    | BJ-106 (Han-Beijing) | 0.5                |   |
| 24 |                    | BJ-107 (Han-Beijing) | 0.5                |   |
| 25 |                    | BJ-111 (Han-Beijing) | 0.5                |   |
| 26 |                    | BJ-108 (Han-Beijing) | 0.5                |   |
| 27 |                    | BJ-109 (Han-Beijing) | 0.5                |   |
| 28 | logisticRegression | BJ-1 (Han-Beijing)   | 1.0                |   |
| 29 |                    | BJ-2 (Han-Beijing)   | 1.0                |   |
| 30 |                    | BJ-100 (Han-Beijing) | 0.51025            |   |
| 31 |                    | BJ-101 (Han-Beijing) | 0.51084            |   |
| 32 |                    | BJ-102 (Han-Beijing) | 0.72476            |   |
| 33 |                    | BJ-103 (Han-Beijing) | 0.50024            |   |
| 34 |                    | BJ-104 (Han-Beijing) | 0.51158            |   |
| 35 |                    | BJ-105 (Han-Beijing) | 0.50005            |   |
| 36 |                    | BJ-106 (Han-Beijing) | 0.50072            |   |
| 37 |                    | BJ-107 (Han-Beijing) | 0.50051            |   |
| 38 |                    | BJ-111 (Han-Beijing) | 0.51869            |   |
| 39 |                    | BJ-108 (Han-Beijing) | 0.51869            |   |
| 40 |                    | BJ-109 (Han-Beijing) | 0.53099            |   |
| 41 | svm                | BJ-1 (Han-Beijing)   | 1.0                |   |
| 42 |                    | BJ-2 (Han-Beijing)   | 1.0                |   |
| 43 |                    | BJ-100 (Han-Beijing) | 0.50943            |   |
| 44 |                    | BJ-101 (Han-Beijing) | 0.51549            |   |

450

451

**Supplementary figure 18.** Similarity result in “withinSamples”.

452

The newest accessed version is up to December 7, 2020. The software will be regularly



453 updated and Linux-based version will be released soon.

454

455 **Supplementary table 5.** Indications from mismatch number results (mismatch number is the  
456 total number of different alleles). Sample pairs are the number of pairs in the corresponding  
457 mismatch number.

| Mismatch number | Sample pairs | Pairs belonging to the same haplogroup | Pairs belonging to different haplogroups | Percentage of pairs belonging to different haplogroups |
|-----------------|--------------|----------------------------------------|------------------------------------------|--------------------------------------------------------|
| 0               | 89           | 89                                     | 0                                        | 0                                                      |
| 1               | 116          | 114                                    | 2                                        | 1.724%                                                 |
| 2               | 211          | 205                                    | 6                                        | 2.844%                                                 |
| 3               | 449          | 428                                    | 21                                       | 4.677%                                                 |
| 4               | 820          | 751                                    | 69                                       | 8.415%                                                 |
| 5               | 1565         | 1300                                   | 265                                      | 16.932%                                                |
| 6               | 2462         | 1869                                   | 593                                      | 24.086%                                                |
| 7               | 4221         | 2721                                   | 1509                                     | 35.750%                                                |

458

459

460 **Supplementary table 6.** Indications from mismatch step results (mismatch step is the total  
461 number of different allele steps). Sample pairs are the number of pairs in the corresponding  
462 mismatch step.

| Mismatch step | Sample pairs | Pairs belonging to the same haplogroup | Pairs belonging to different haplogroups | Percentage of pairs belonging to different haplogroups |
|---------------|--------------|----------------------------------------|------------------------------------------|--------------------------------------------------------|
| 0             | 89           | 89                                     | 0                                        | 0                                                      |
| 0<s≤1         | 104          | 102                                    | 2                                        | 1.923%                                                 |
| 1<s≤2         | 180          | 175                                    | 5                                        | 2.778%                                                 |
| 2<s≤3         | 332          | 313                                    | 19                                       | 5.723%                                                 |
| 3<s≤4         | 536          | 505                                    | 31                                       | 5.784%                                                 |
| 4<s≤5         | 881          | 785                                    | 96                                       | 10.897%                                                |
| 5<s≤6         | 1351         | 1130                                   | 221                                      | 16.358%                                                |
| 6<s≤7         | 1848         | 1358                                   | 490                                      | 26.515%                                                |

463

464
